# Supplementary material for: Circularization of flavivirus genomic RNA inhibits de novo translation initiation
Source: PubMed Central journal article supplement (PMC6765113; doi:10.1093/nar/gkz686), 2019-08-08
Supplement: gkz686_supplemental_file.pdf [file gkz686_supplemental_file.pdf]

# Supplementary Information for

## **Circularisation of flavivirus genomic RNA inhibits *de novo* translation initiation.**

Thomas J. Sanford<sup>1</sup>, Harriet V. Mears<sup>1</sup>, Teodoro Fajardo Jr<sup>1</sup>, Nicolas Locker<sup>2</sup>, Trevor R. Sweeney<sup>1\*</sup>.

1 Division of Virology, Department of Pathology, University of Cambridge, Addenbrooke's Hospital, Hills Road, Cambridge, UK.

2 Faculty of Health and Medical Sciences, School of Biosciences and Medicine, University of Surrey, Guildford, UK.

\*Correspondence to Trevor Sweeney

Address: Division of Virology, Department of Pathology, University of Cambridge, Box 237 Level 5 Lab Block, Addenbrooke's Hospital, Hills Road, Cambridge, CB2 0QQ, UK.

Email: [ts629@cam.ac.uk](mailto:ts629@cam.ac.uk)

Phone: +44(0)1223336072

### **This PDF file includes:**

Figures. S1 to S3

Table S1 and S2

**A**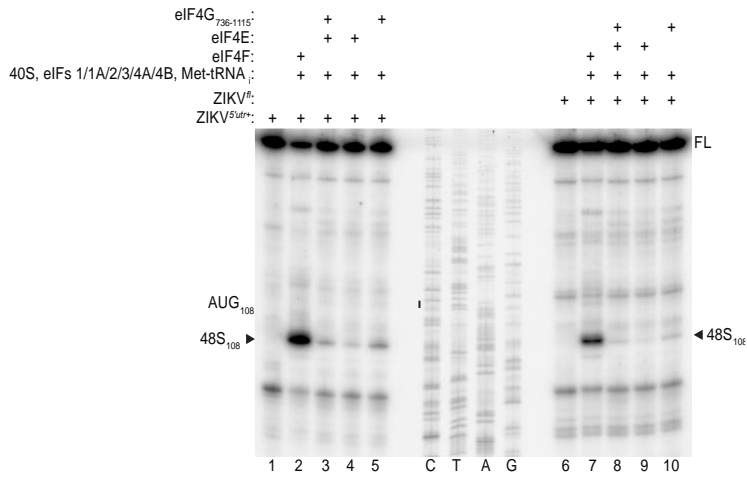**B**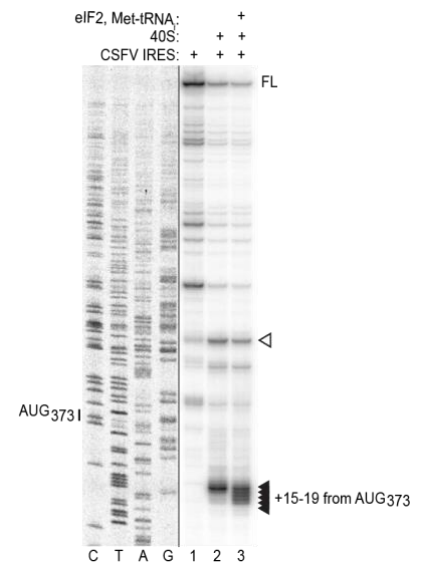**C**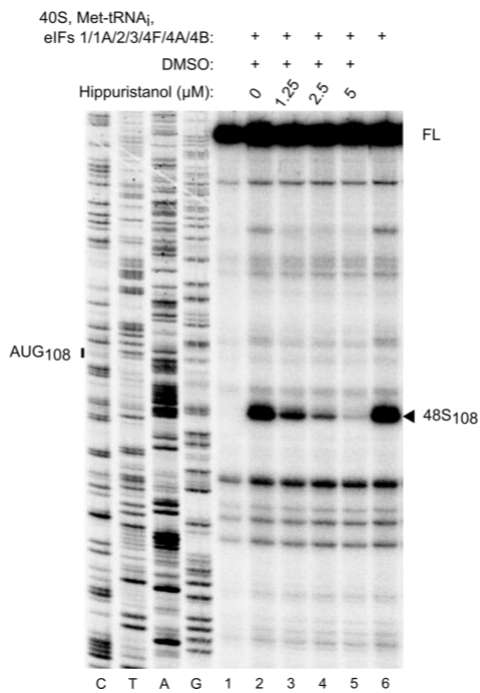**D**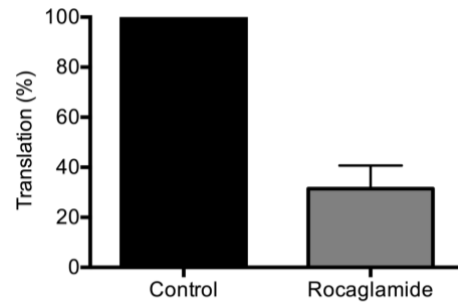**E**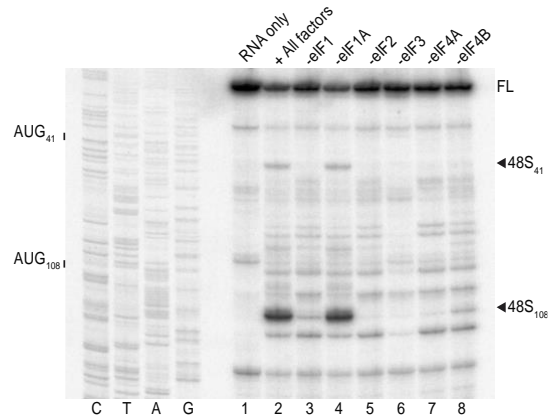

**Figure S1. Translation factor requirements on different viral RNAs**

**A)** Toeprinting analysis of 48S complex formation upon capped ZIKV<sup>5'utr+</sup> and ZIKV<sup>fl</sup> RNA. AUG<sub>108</sub> is labelled on the left and marked with a bar in the gel. Toeprints caused by 48S complex assembly are marked with a closed arrowhead. FL, full length cDNA signal.

**B)** Toeprinting analysis of 48S complex formation upon CSFV IRES. Toeprints caused by 48S complex assembly are marked with a closed arrowhead on the right. RT stops caused by IRES/40S interactions are marked with an open arrowhead on the right. FL, full length. The black line demarks different exposures of the same gel.

**C)** Toeprinting analysis of 48S complex formation upon capped ZIKV<sup>5'utr+</sup> at the indicated concentrations of hippuristanol. Selected codons are labelled on the left and toeprints caused by 48S complex assembly are marked with a closed arrowhead on the right. Lanes with 5% DMSO are indicated. FL, full length.

**D)** Luciferase activity at 6 hrs post electroporation of capped ZIKV<sup>Nluc</sup> RNA in the presence of 30 nM rocaglamide A relative to the absence of drug. Cells were pre-treated with rocaglamide A for 3 hours before electroporation. Rocaglamide was maintained during infection. Data are mean+/-SEM of three independent experiments.

**E)** Toeprinting analysis of 48S complex formation upon capped ZIKV<sup>fl</sup> RNA in the presence or absence of specific eIFs. Selected codons are labelled on the left. Toeprints caused by 48S complex assembly are marked with a closed arrowhead on the right. FL, full length cDNA signal.

Related to Figure 1.

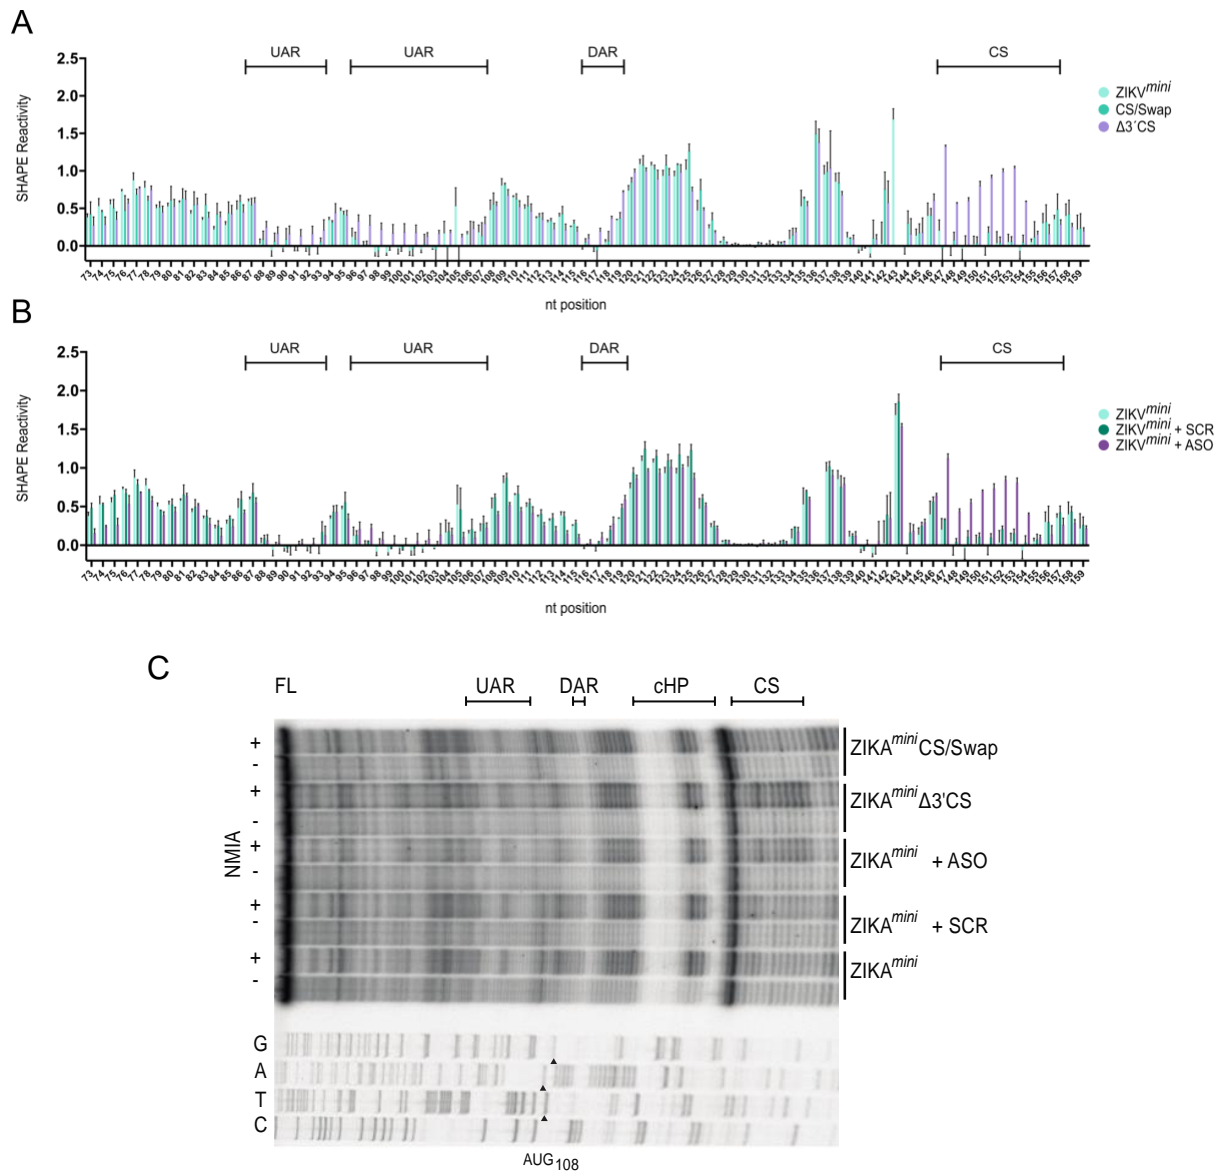

**Figure S2. SHAPE analysis of the ZIKV<sup>mini</sup> RNAs**

**A, B** Wildtype (WT) ZIKV<sup>mini</sup> RNA SHAPE reactivity in light green is compared to (A) CS swap (dark green) and Δ3' CS (purple) or to (B) WT annealed to a scrambled oligo (SCR) (dark green) or anti-sense oligo (ASO) (purple) RNA. SHAPE reactivities were calculated relative to the top 10% of reactivities from nt 73-159. Data are mean±SD of normalised SHAPE reactivities at each base from three experiments. The same wildtype dataset is used in each panel as all conditions were examined simultaneously.

**C** Representative gel used to calculate SHAPE reactivities. Related to Figure 3.

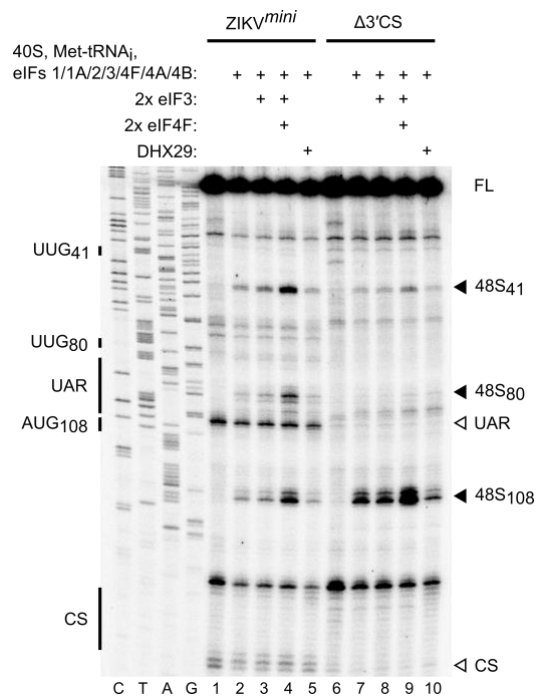

**Figure S3. Addition of more eIF4F or DHX29 does not overcome the circularisation induced scanning defect**

Toeprinting analysis of 48S complex assembly on capped *ZIKV<sup>mini</sup>* or *ZIKV<sup>mini</sup>- $\Delta 3'CS$*  using the conditions illustrated. Selected codons are labelled on the left and toeprints caused by 48S complex assembly are marked with a closed arrowhead on the right. Open arrowheads mark RT stops caused by hybridization of the 5' and 3' cyclisation elements. FL, full length. Related to Figure 4.

|           |                                                                     |
|-----------|---------------------------------------------------------------------|
| ZIKV ASO  | AGCATATTGACGCTGGGAAAGACCAGAGACT <b>CTATAGTGAGTCGTATTA</b>           |
| DENV1 ASO | CAGCATATTGACGCTGGGAGAGACCAGAGATCCTGCTGTCT <b>CTATAGTGAGTCGTATTA</b> |
| DENV4 ASO | CAGCATATTGACGCTGGGAAAGACCAGAGATCCTGCTGTCT <b>CTATAGTGAGTCGTATTA</b> |
| SCR       | ATGGCAAACCCAGATTGCTATTCCAACGTCT <b>CTATAGTGAGTCGTATTA</b>           |

**Table S1. Primers**

DNA used as a template for transcription of RNA oligos. The T7 promoter is shown in bold.

| nt  | ZIKV <sup>fl</sup> vs<br>ZIKV <sup>fl</sup> -Δ3' CS | ZIKV <sup>mini</sup> vs<br>ZIKV <sup>mini</sup><br>CS/Swap | ZIKV <sup>mini</sup> vs<br>ZIKV <sup>mini</sup> Δ3'<br>CS | ZIKV <sup>mini</sup> vs<br>ZIKV <sup>mini</sup> +ASO | ZIKV <sup>mini</sup> vs<br>ZIKV <sup>mini</sup> +SCR |
|-----|-----------------------------------------------------|------------------------------------------------------------|-----------------------------------------------------------|------------------------------------------------------|------------------------------------------------------|
| 144 | 0.107                                               | 0.042                                                      | 0.187                                                     | 0.033                                                | 0.092                                                |
| 145 | 0.100                                               | 0.836                                                      | 0.928                                                     | 0.049                                                | 0.318                                                |
| 146 | 0.388                                               | 0.761                                                      | 0.122                                                     | 0.072                                                | 0.572                                                |
| 147 | 0.508                                               | 0.089                                                      | 0.004                                                     | 0.001                                                | 0.444                                                |
| 148 | 0.975                                               | 0.335                                                      | 0.004                                                     | 0.002                                                | 0.422                                                |
| 149 | 0.845                                               | 0.629                                                      | 0.006                                                     | 0.002                                                | 0.211                                                |
| 150 | 0.572                                               | 0.918                                                      | 0.005                                                     | 0.001                                                | 0.361                                                |
| 151 | 0.845                                               | 0.090                                                      | 0.003                                                     | 0.002                                                | 0.278                                                |
| 152 | 0.422                                               | 0.998                                                      | 0.003                                                     | 0.002                                                | 0.189                                                |
| 153 | 0.315                                               | 0.935                                                      | 0.003                                                     | 0.001                                                | 0.320                                                |
| 154 | 0.980                                               | 0.220                                                      | 0.003                                                     | 0.002                                                | 0.244                                                |
| 155 | 0.940                                               | 0.715                                                      | 0.063                                                     | 0.134                                                | 0.948                                                |
| 156 | 0.712                                               | 0.858                                                      | 0.287                                                     | 0.127                                                | 0.560                                                |
| 157 | 0.948                                               | 0.487                                                      | 0.450                                                     | 0.068                                                | 0.603                                                |
| 158 | 0.444                                               | 0.884                                                      | 0.239                                                     | 0.205                                                | 0.734                                                |
| 159 | 0.869                                               | 0.974                                                      | 0.904                                                     | 0.944                                                | 0.977                                                |
| 160 | 0.371                                               | 0.432                                                      | 0.054                                                     | 0.089                                                | 0.209                                                |

**Table S2. Statistical significance of differences between SHAPE reactivities of nucleotides (nt) in the 5' CS element.**

Differences in mean SHAPE reactivities from three independent experiments were compared using an unpaired two-tailed Students t-test. P values calculated in GraphPad Prism and rounded to four decimal places are shown. P values <0.05 (highlighted in green) were deemed statistically significant.

Related to Figures 2 and 3.
